# Supplementary material
Source: HighWire-hosted journal article supplement (https://erj.ersjournals.com/content/56/1/2001704)
Supplement: inline-supplementary-material-1 [file inline-supplementary-material-1.pdf]

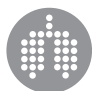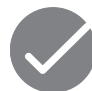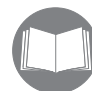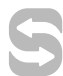

SHAREABLE PDF

# A global respiratory perspective on the COVID-19 pandemic: commentary and action proposals

Teresa To<sup>1</sup>, Giovanni Viegi<sup>2</sup>, Alvaro Cruz<sup>3</sup>, Luis Taborda-Barata<sup>4</sup>, Innes Asher<sup>5</sup>, Digambar Behera<sup>6</sup>, Kazi Bennoor<sup>7</sup>, Louis-Philippe Boulet<sup>8</sup>, Jean Bousquet<sup>9</sup>, Paulo Camargos<sup>10</sup>, Claudia Conceição<sup>11</sup>, Sandra Gonzalez Diaz<sup>12</sup>, Asma El-Sony<sup>13</sup>, Marina Erhola<sup>14</sup>, Mina Gaga<sup>15</sup>, David Halpin<sup>16</sup>, Letitia Harding<sup>17</sup>, Tamaz Maghlakelidze<sup>18</sup>, Mohammad Reza Masjedi<sup>19</sup>, Youssef Mohammad<sup>20</sup>, Elizabete Nunes<sup>21</sup>, Bernard Pigearias<sup>22</sup>, Talant Sooronbaev<sup>23</sup>, Rafael Stelmach<sup>24</sup>, Ioanna Tsiligianni<sup>25</sup>, Le Thi Tuyet Lan<sup>26</sup>, Arunas Valiulis<sup>27</sup>, Chen Wang<sup>28</sup>, Sian Williams<sup>29</sup> and Arzu Yorgancioglu<sup>30</sup>

**Affiliations:** <sup>1</sup>The Hospital for Sick Children, Dalla Lana School of Public Health, University of Toronto, Toronto, ON, Canada. <sup>2</sup>CNR Institutes of Clinical Physiology, Pisa, and Biomedical Research and Innovation, Palermo, Italy. <sup>3</sup>ProAR Foundation and Federal University of Bahia, Salvador, Brazil. <sup>4</sup>Dept of Allergy and Clinical Immunology, Cova da Beira University Hospital Centre, Covilhã, Portugal. <sup>5</sup>Dept of Paediatrics and Child Health, University of Auckland, Auckland, New Zealand. <sup>6</sup>OSD, All India Institutes of Medical Sciences (AIIMS), Raebareilly, India. <sup>7</sup>Dept of Respiratory Medicine, National Institute of Diseases of the Chest and Hospital, Dhaka, Bangladesh. <sup>8</sup>Québec heart and Lung Institute, Laval University, Québec, QC, Canada. <sup>9</sup>MACVIA-France, Fondation Partenariaire FMC VIA-LR, CHRU Arnaud de Villeneuve, Montpellier, France. <sup>10</sup>Universidade Federal de Minas Gerais, Faculdade de Medicina, Departamento de Pediatria, Belo Horizonte, Brazil. <sup>11</sup>Instituto de Higiene e Medicina Tropical, Institute of Tropical Medicine and Hygiene, NOVA University of Lisbon, Lisbon, Portugal. <sup>12</sup>Hospital Universitario y Facultad de Medicina, Monterrey Nuevo Leon, Mexico. <sup>13</sup>Public Health Epidemiological Laboratory [Epi Lab] for Research and Development, Khartoum, Sudan. <sup>14</sup>Division of Health and Social Service, Finnish Institute for Health and Welfare, Helsinki, Finland. <sup>15</sup>7th Respiratory Medicine Dept, Asthma Cen, Athens Chest Hospital, Athens, Greece. <sup>16</sup>University of Exeter Medical School, College of Medicine and Health, Exeter, UK. <sup>17</sup>Asthma and Respiratory Foundation, Wellington, New Zealand. <sup>18</sup>Ivane Javakhishvili Tbilisi State University, Pulmonology Dept, Chapidze Emergency Cardiology Center, Tbilisi, Georgia. <sup>19</sup>Shahid Beheshti University of Medical Sciences, Tehran, Iran. <sup>20</sup>National Center for Research in Chronic Respiratory Diseases, Tishreen University, School of Medicine, Latakia, Syria. <sup>21</sup>Pulmonology Dept, Maputo Central Hospital, Maputo, Mozambique. <sup>22</sup>Espace Francophone de Pneumologie, La Maison du poumon, Paris, France. <sup>23</sup>Kyrgyzstan National Centre of Cardiology and Internal Medicine, Euro-Asian Respiratory Society, Bishkek, Kyrgyzstan. <sup>24</sup>ProAR Foundation and Heart Institute [InCor] Hospital das Clinicas, Faculdade de Medicina, Universidade de Sao Paulo, Sao Paulo, Brazil. <sup>25</sup>International Primary Care Respiratory Group; Dept of Social Medicine, Faculty of Medicine, University of Crete, Heraklion, Greece. <sup>26</sup>Respiratory Care Center, University Medical Center, Ho Chi Minh City, Vietnam. <sup>27</sup>Clinic of Children's Diseases, Institute of Clinical Medicine, and Dept of Public Health, Institute of Health Sciences, Vilnius University, Vilnius, Lithuania. <sup>28</sup>Peking Union Medical College, Chinese Academy of Medical Science, Beijing, China. <sup>29</sup>International Primary Care Respiratory Group, London, UK. <sup>30</sup>Dept of Pulmonology, Medical Faculty, Celal Bayar University, Manisa, Turkey.

**Correspondence:** Teresa To, The Hospital for Sick Children, Research Institute, Dalla Lana School of Public Health, University of Toronto, Toronto, Ontario, Canada. E-mail: [teresa.to@sickkids.ca](mailto:teresa.to@sickkids.ca)

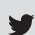

@ERSpublications

This paper offers practical and feasible actions to be implemented at patient, healthcare provider and community level to combat COVID-19 while attending, maintaining and strengthening ongoing health management in people with lung diseases <https://bit.ly/30yNyhP>

**Cite this article as:** To T, Viegi G, Cruz A, *et al.* A global respiratory perspective on the COVID-19 pandemic: commentary and action proposals. *Eur Respir J* 2020; 56: 2001704 [<https://doi.org/10.1183/13993003.01704-2020>].

This single-page version can be shared freely online.

The novel coronavirus disease 2019 (COVID-19) is caused by the severe acute respiratory syndrome coronavirus 2 (SARS-CoV-2) [1, 2]. The World Health Organization (WHO) declared the COVID-19 outbreak a pandemic on 11 March, 2020, demanding effective national and global mitigation measures, strong public health response and coordination. To date, the SARS-CoV-2 pandemic has affected over 5 million individuals worldwide with an overall 7.02% (median 3.41%, ranges 0.06% to 31.25%) case fatality ratio (European Center for Disease Prevention and Control dashboard: [www.ecdc.europa.eu](http://www.ecdc.europa.eu), as of 22 May, 2020) [3]. This ratio may be overstated since it is based primarily on hospitalised or notified cases.
